# Supplementary material for: Putative Interaction Proteins of the Ubiquitin Ligase Hrd1 in Magnaporthe oryzae
Source: PubMed Central journal article supplement — Evol Bioinform Online. 2018 Dec 7;14:1176934318810990. doi: 10.1177/1176934318810990 (PMC6291861; doi:10.1177/1176934318810990), 2018-12-07
Supplement: Table_S1.pdf [file Table_S1.pdf]

**Table S1. Primers used in this study**

| <b>Primer name</b> | <b>Sequence (5'-3')</b>                                     | <b>Remark</b>                                                 |
|--------------------|-------------------------------------------------------------|---------------------------------------------------------------|
| HRD1 Com-F         | ACTCACTATAGGGCGAATTGGGTACTCAAATTGGTTG<br>GAGATACCCAGTAACAG  | Amplify <i>MoHRD1</i> coding sequence<br>with native promoter |
| HRD1 Com-R         | CACCACCCCGGTGAACAGCTCCTCGCCCTTGCTCACA<br>TCATCCTCATCCTCAACT | Amplify <i>MoHRD1</i> coding sequence<br>with native promoter |
| HRD1 Con-F         | TGAGCAGAGCCATGATGATG                                        | Verify the MoHrd1::GFP fusion<br>protein expression vector    |
| GFP-R              | CGGTGGTGCAGATGAACTTC                                        | Verify the MoHrd1::GFP fusion<br>protein expression vector    |
